# Supplementary material for: Bidirectional acceleration of carrier separation spatially via N-CQDs/atomically-thin BiOI nanosheets nanojunctions for manipulating active species in a photocatalytic process
Source: Royal Society of Chemistry journal article supplement (doi:10.1039/c6ta00284f), 2016-01-01
Supplement: c6ta00284f1.pdf [file c6ta00284f1.pdf]

## Supporting Information

### **Bidirectional acceleration of carrier separation spatially via N-CQDs/atomically-thin BiOI nanosheets nanojunctions for manipulating active species in a photocatalytic process**

Jun Di,<sup>a</sup> Jiexiang Xia,<sup>a,\*</sup> Mengxia Ji,<sup>a</sup> Li Xu,<sup>a</sup> Sheng Yin,<sup>a</sup> Zhigang Chen,<sup>b</sup> Huaming Li<sup>1,\*</sup>

<sup>a</sup>School of Chemistry and Chemical Engineering, Institute for Energy research, Jiangsu University, 301 Xuefu Road, Zhenjiang, 212013, P. R. China

<sup>b</sup>School of the Environment, Jiangsu University, 301 Xuefu Road, Zhenjiang, 212013, P. R. China.

\*Corresponding author: Tel.:+86-511-88791108; Fax: +86-511-88791108;

E-mail address: xjx@ujs.edu.cn; lhm@ujs.edu.cn

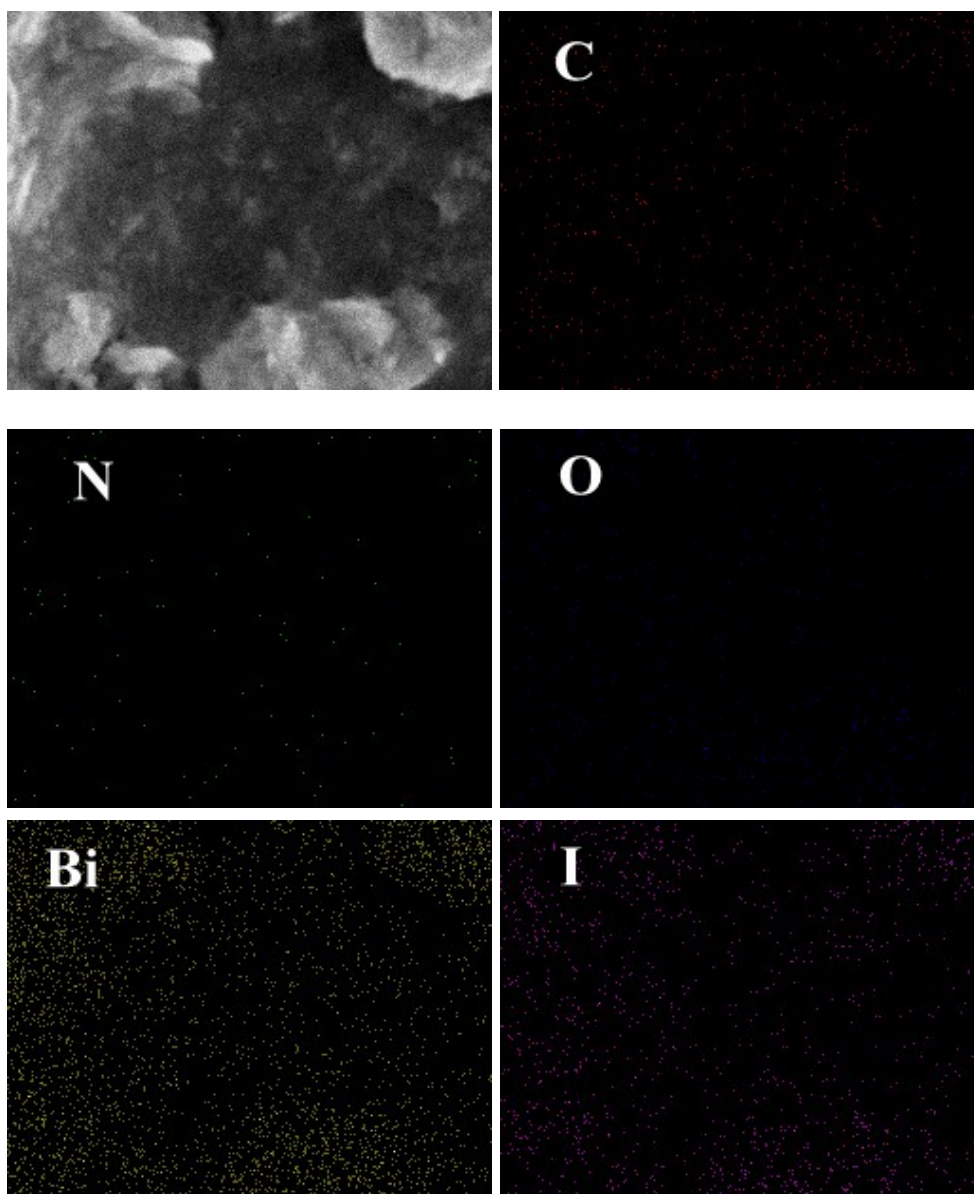

**Figure S1.** Typical SEM image of N-CQDs/BiOI samples and corresponding elemental mapping images of C, N, O, Bi, and I.

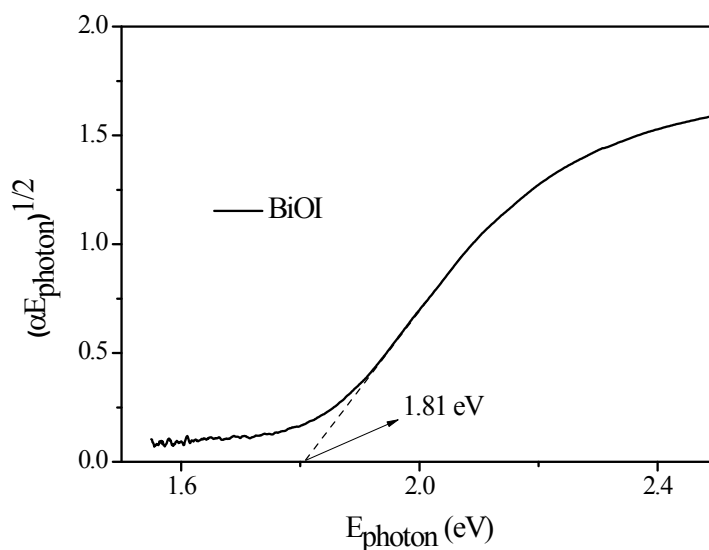

**Figure S2.**  $(\alpha E_{\text{photon}})^{1/2}$  vs.  $E_{\text{photon}}$  curves of the as-prepared pure BiOI sample.

**Table S1** Pseudo-first-order rate constant for RhB photocatalytic oxidation under different photocatalysts

| Series | Photocatalyst | The first order kinetic equation | $k$<br>( $\text{min}^{-1}$ ) | $R^2$  |
|--------|---------------|----------------------------------|------------------------------|--------|
| 1      | BiOI          | $-\ln(C/C_0) = 0.0145t$          | 0.0145                       | 0.9965 |
| 2      | N-CQDs/BiOI-1 | $-\ln(C/C_0) = 0.0283t$          | 0.0283                       | 0.9958 |
| 3      | N-CQDs/BiOI-2 | $-\ln(C/C_0) = 0.0369t$          | 0.0369                       | 0.9977 |
| 4      | N-CQDs/BiOI-4 | $-\ln(C/C_0) = 0.0267t$          | 0.0267                       | 0.9957 |
